# Supplementary material
Source: Research Square preprint supplement (doi:10.21203/rs.3.rs-9700510/v1)
Supplement: Supplementary file 1 [file 3c39f8633efedeb8d1417546.doc]

**Research Highlights**

- Demonstrating surface engineered xerogel infiltration matrix derived from *Musa spp.* (banana)
- Tuning hydrochar technique, characterizing, and unraveling underlying local mechanism
- A boost up green chelator of chromium and iodine from aqueous matrices
