# Supplementary material
Source: Research Square preprint supplement (doi:10.21203/rs.3.rs-9700510/v1)
Supplement: Supplementary file 2 [file 4823b673c184624184a6efba.doc]

**Supplementary information**

Surface-engineered naturally-derived xerogel for boosting chelation of refractory contaminants: From low-temperature hydrochar strategies, characterization probes to underlying mechanisms

Shashi Prabha Dubey a,b, Umakant Kumar b, Krishna Roy b, Sanna Hokkanen a, Amarendra Dhar Dwivedi a,c,*

a Department of Separation Science, LUT School of Engineering Sciences, LUT University, Sammonkatu 12, Mikkeli 50130, Finland

b Laboratory of Green (nano)materials & Environment Chemistry, Department of Chemistry, T. P. S. College, Patna, (Patliputra University, Patna), 800001, India

c Department of Chemistry, S.G.G.S. College, Patna City (Patliputra University, Patna), 800008, India

*Corresponding author*:

*Amarendra Dhar Dwivedi (E-mail: amarendradhar@gmail.com)

**(12 pages, 3 Figures, 3 Tables)**

**TextS1.** Materials

**S2.** Experimental procedures

**S3.** Quantification of XIM sorption metrics

**FIGURES:**

**Figure S1:** FTIR spectra of native and post-treated XIM xerogel

**Figure S2:** Scatter chart of the initial pH and the final pH of the Cr(VI) solution

**Figure S3:** Chromium species distribution vs. pH (25°C) (aqueous equilibria showing redox state dominance)

**TABLES:**

**Table S1:** Isotherm data obtained from xerogel derivatives

**Table S2:** Rate kinetic data obtained from xerogel derivatives

**Table S3:** Thermodynamic data of xerogel derivatives: Free energy change (ΔG), Enthalpy change (ΔH) and Entropy change (ΔS)

*SI references*

**S1.** **Materials**

Potassium dichromate (K2Cr2O7), sulphuric acid (H2SO4), hydrochloric acid (HCl), sodium hydroxide (NaOH), sodium chloride (NaCl), calcium carbonate (CaCO3), ferric chloride (FeCl3), silver nitrate (AgNO3), lead nitrate (PbNO3), copper(II) nitrate [Cu(NO3)2], sodium arsenate ( Na3AsO4), 1,5-diphenylcarbazide (DPC), acetone, powdered activated charcoal, cyclohexane and solid iodine (I2) were purchased from Merck, Mumbai, India. Fresh bananas were purchased from a local market in Patna, India. All chemicals used in the study were of analytical grade without further purification.

*Chromium stock solution preparation*

A stock solution of 1000 mg/L hexavalent chromium (Cr(VI)) was prepared by dissolving 2.8 g of analytical grade (99.9% purity) potassium dichromate (K2​Cr2​O7) in 1000 mL of deionized water. The stock solution was stored in glass reagent bottles at <8°C. Working solutions were prepared by diluting the stock with distilled water to achieve the desired concentrations. All experiments were conducted under isothermal conditions (25±2°C), with pH adjusted to desired levels using 0.1N NaOH or 0.1N HCl. For the preparation of reagents and the experiments, we employed ultrapure water obtained from Sartorius AriumBagtank 100L system, with a conductivity of 0.055μS.cm-1 (18.2MΩ.cm).

**S2. Experimental procedures**

The potential of XIM on Cr(VI) was assessed at room temperature and uncontrolled pH (~5.6), using a gel rocker (180 rpm). PAC was selected as a standard control sample of water purification. Cr(VI) solution with a concentration of 10 mg per litre was freshly prepared by diluting the stock solution. 250 mg of DPC was added to 50 mL acetone and the solution was stored in a dark, air-tight bottle at 4oC. XIM dosing at 0.5g/L was added to Cr(VI) solutions (10 mg per litre) and kept on the gel rocker for 14 hours. Concentration of Cr(VI) was determined using a DPC treatment by Ultraviolet–Visible (UV–VIS) spectrophotometer (Perkin-Elmer Lambda-45,Waltham, MA, USA). All experiments were run in triplicate and the average results were used in the calculations.

**S2.1 Iodine study**

XIM samples (dosing at 2.5 g/L) were introduced into a glass vial containing water or a hexane solution of iodine with an initial concentration of 1 mM. In parallel, blank mixed solutions without XIM was maintained under identical conditions as a control to account for any changes in iodine concentration not attributable to (ad)sorption. At predetermined time intervals, aliquots were carefully withdrawn and analysed iodine concentrations. The residual iodine concentration in each aliquot was quantified using a UV–VIS spectrophotometer, and the corresponding variations in absorbance were used to calculate the extent of iodine removal by XIM. This spectroscopic approach enabled precise tracking of reaction kinetics and provided reliable data to evaluate both the rate and efficiency of iodine uptake.

**S3. Quantification of XIM sorption metrics**

Sequestration of chromium and iodine by XIM was quantified by determining the removal efficiency (*Re*) and specific uptake capacities (*qe*) at equilibrium and (*qt)* at given time *t*. These parameters were derived using the initial (*C*0​), equilibrium (*Ce*​), and time-specific (*Ct*​) contaminant concentrations relative to the solution volume (*V*) and xerogel mass (*w*), as shown in Eqs. 1-3:


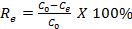
 (1)


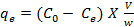
 (2)


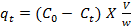
 (3)

**S.3.1 Kinetics analysis**

To investigate the reaction rates, experimental data were fitted to the pseudo-first-order and pseudo-second-order (PSO) models (Lagergren, 1898; Ho et al., 2000). PSO model (Ho et al., 2000) demonstrated a high correlation with experimental data throughout uptake. The mathematical expressions for these models are:


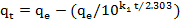
 (4)


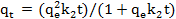
 (5) *qt*​ (mg/g) is the amount of contaminant adsorbed at time *t* (min), while *k*1 (​ *min-*1) and *k*2​ (g/mg·min) denote the rate constants for the pseudo-first-order and pseudo-second-order models, respectively.

**S.3.2 Equilibrium analysis**

Equilibrium data were analyzed using three distinct isotherm models to understand the surface interactions.

*Langmuir model*

First, the Langmuir model was applied (Equation 6); this model assumes monolayer adsorption occurs on a surface with energetically uniform sites (Langmuir, 1918):


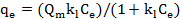
 (6)

where Ce is concentration (mg/L) of contaminant at equilibrium, *Qm*​ (mg/g) is the maximum adsorption capacity, and *kl*​ (L/mg) is the Langmuir affinity constant.

*Freundlich model*

Second, the Freundlich model (Equation 7) was utilized to describe adsorption on heterogeneous surfaces via an exponential relationship (Freundlich, 1906):


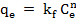
 (7)

where *kf*​ is the Freundlich constant and *n* indicates the adsorption intensity.

*Sips isotherm*

Finally, the Sips isotherm (Equation 8), a three-parameter hybrid model, was employed to bridge the Langmuir and Freundlich approaches (Umpleby et al., 2001):


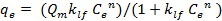
 (8)

In this model, *klf*​ and *n* are empirical constants. The Sips equation adapts to concentration variances: at low concentrations, it mimics Freundlich behavior (*Ce*​→ 0 or when term *klf.Ce* is small), whereas at high concentrations, it predicts Langmuir-type monolayer saturation, provided the heterogeneity factor *n* (or 1/*n*) equals 1 (Gunay et al., 2007).


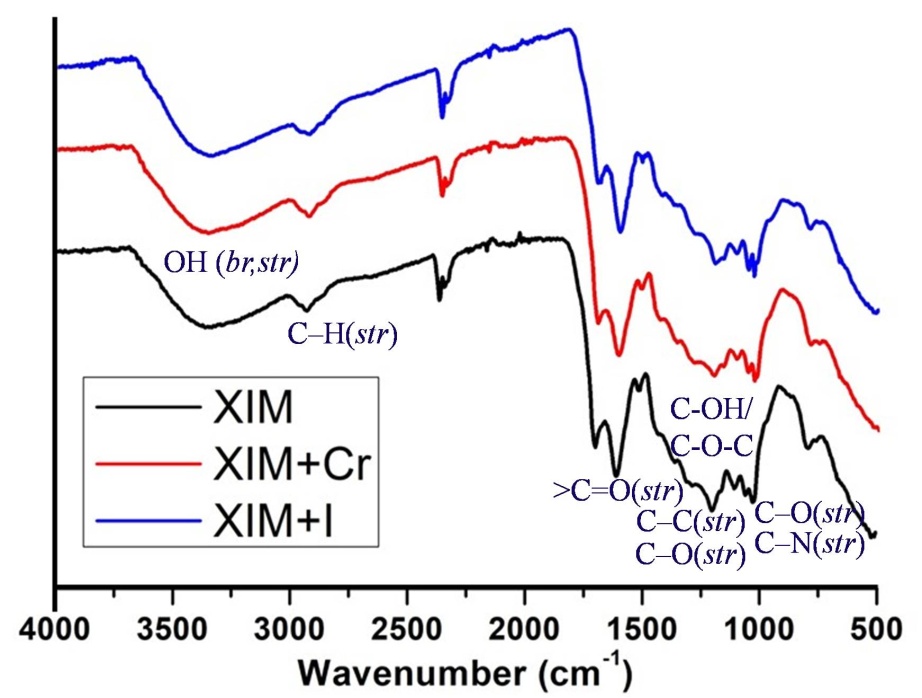


**Figure S1:** FTIR spectra of native and post-treated XIM xerogel


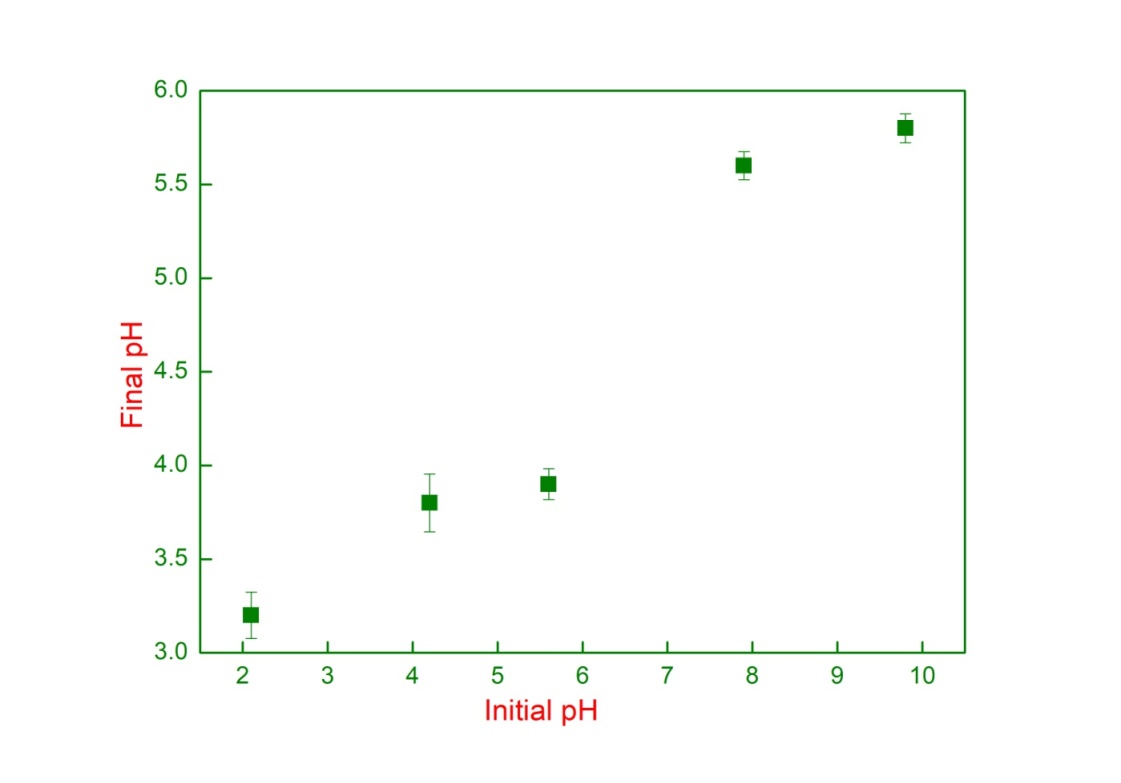


**Figure S2:** Scatter chart of the initial pH and the final pH of the Cr(VI) solution


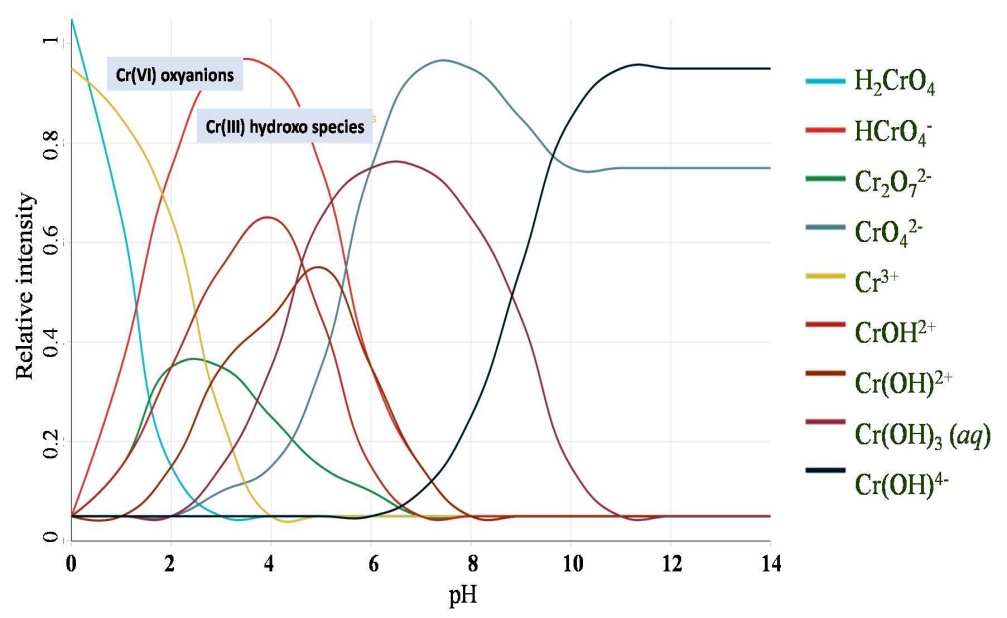


**Figure S3:** Chromium species distribution vs. pH (25°C) (aqueous equilibria showing redox state dominance)

| **Langmuir** | | | | | **Freundlich** | | | | | **Sips** | | | | | |
| --- | --- | --- | --- | --- | --- | --- | --- | --- | --- | --- | --- | --- | --- | --- | --- |
| *Qm*  *(mg.g-1)* | *k­l* | *Radj2​* | *F-*  *value* | *χ2* | *kf* | *n* | *Radj2​* | *F-*  *value* | *χ2* | *Qm*  *(mg.g-1)* | *klf* | *n* | *Radj2​* | *F-value* | *χ2* |
| 41.4 | 0.59 | 0.9401 | 314 | 12.2 | 4.68x102 | 3.09 | 0.9571 | 441 | 8.71 | 60.7 | 0.35 | 0.57 | 0.9747 | 501 | 5.14 |

**Table S1:** Isotherm data obtained from xerogel derivatives

**Table S2:** Rate kinetic data obtained from xerogel derivatives

|  |  | **Pseudo-first-order** | | | | | **Pseudo-second-order** | | | | |
| --- | --- | --- | --- | --- | --- | --- | --- | --- | --- | --- | --- |
|  | *a qe exp*  *(mg.g-1)* | *k1* | *bqe*  *(mg.g-1)* | *Radj2​* | *F-*  *value* | *χ2* | *k2* | *cqe*  *(mg.g-1)* | *Radj2​* | *F-value* | *χ2* |
| *d Cr(VI)* | 17.37 | 0.30 | 16.99 | 0.9443 | 994 | 1.42 | 0.019 | 19.64 | 0.9726 | 2033 | 0.70 |
|  |  |  |  |  |  |  |  |  |  |  |  |
| *e[Iodine]water* | 181.52 | 1.60 | 174.57 | 0.9268 | 676 | 147.61 | 0.013 | 187.30 | 0.9369 | 785 | 127.2 |

*Note: a (experimentally derived data); b, c (calculated values); d CrVI and e Iodine/water* *results* (*fitted pseudo-second-order reaction*)

**Table S3:** Thermodynamic data of xerogel derivatives: Free energy change (ΔG), Enthalpy change (ΔH) and Entropy change (ΔS)

|  | ***T*** *(K)* | ***Kc*** | ***∆G*** *(kJ/mol)* | ***∆S*** *(kJ/mol.K)* | ***∆H*** *(kJ/mol)* | ***Radj2​*** |
| --- | --- | --- | --- | --- | --- | --- |
| *Cr(VI) energetics* | | | | | | |
|  | 277 | 0.2521 | -0.58 |  |  |  |
| **XIM** | 298 | 1.6320 | -4.10 | +0.16 | +43.98 | 0.9994 |
|  | 313 | 2.4426 | -6.40 |  |  |  |

*Note:* *For derived thermodynamic parameters, the universal gas constant; R = 8.314x10-3*

*kJ/mol.K*

*SI references*

- Gunay A, Arslankaya E, Tosun I (2007). Lead removal from aqueous solution by natural and pretreated clinoptilolite: Adsorption equilibrium and kinetics. *J. Hazard. Mater.* 146: 362-371.
- H.M.F. Freundlich, Over the adsorption in solution, *J. Phys. Chem.* 57 (1906) 385-470.
- Langmuir, The adsorption of gases on plane surfaces of glass, mica and platinum, *J. Am. Chem. Soc.* 40 (1918) 1361-1367.
- Lagergren S, Zur theorie der sogenannten adsorption geloster stoffe. Kungliga Svenska Vetenskapsakademiens. *Handlingar* 24 **(**1898) 1-39.
- R.J., Umpleby II, S.C., Baxter, Y., Chen, R.N., Shah and K.D., Shimizu, *Anal. Chem.* 73 (2001) 4584.
- Y.S. Ho, G. McKay, D.A.J. Wase and C.F. Foster, Study of the sorption of divalent metal ions on to peat, *Adsorp. Sci. Technol.* 18 (2000) 639-650***.***
